# Supplementary material for: The oxanorbornene approach to 3-hydroxy, 3,4-dihydroxy and 3,4,5-trihydroxy derivatives of 2-aminocyclohexanecarboxylic acid
Source: Beilstein J Org Chem. 2006 May 4;2:9. doi: 10.1186/1860-5397-2-9 (PMC1524792; doi:10.1186/1860-5397-2-9)
Supplement: File 1 — Experimental procedures and spectroscopic data are provided for all new compounds including details of the X-ray diffraction studies for compounds 2b, 26 and 28. [file Beilstein_J_Org_Chem-02-09-s001.doc]

The oxanorbornene approach to 3-hydroxy, 3,4-dihydroxy and 3,4,5-trihydroxy derivatives of 2-aminocyclohexanecarboxylic acid

Ishmael B. Masesane,*a,b Andrei S. Batsanov,a Judith.A. K. Howard,a Raju Modala and Patrick G. Steel*a

aDepartment of Chemistry, University of Durham, South Road, Durham, DH1 3LE, UK.

bDepartment of Chemistry, University of Botswana, P/bag 00704, Gaborone, Botswana.

Email: Ishmael B.Masesane- [masesane@mopipi.ub.bw](mailto:masesane@mopipi.ub.bw);

Patrick G. Steel- [p.g.steel@durham.ac.uk](mailto:p.g.steel@durham.ac.uk)

**ADDITIONAL MATERIALS**

**EXPERIMENTAL**

**Ethyl (*E*)-3-nitropropenoate 1**

N2O4 (9.5 ml, 271 mmol) was added to a stirred and cooled (0oC) mixture of ethyl acrylate (44.5 ml, 410 mmol) and iodine (31 g, 122 mmol) in diethyl ether (400 ml). The reaction mixture was stirred for 1 hour at 0oC and then at room temperature for 4 hours. The resulting dark solution was washed with saturated Na2S2O3 solution (5 x 200 ml). The aqueous layer was extracted with diethyl ether (200 ml) and the organic layers were combined and dried over magnesium sulphate. The solvent was removed under reduced pressure and excess ethyl acrylate was distilled off under *vacuo* at room temperature to give ethyl 2-iodo-3-nitropropanoate(31.1 g, 93 %) as a yellow oil. A solution of DIPEA (5.8 g, 45mmol ) in diethyl ether (10 ml) was then added dropwise to a vigorously stirred and cooled (0 oC) solution of the yellow oil (10.0 g, 37 mmol) in diethyl ether (200 ml) and the mixture was stirred for 15 minutes. The resulting suspension was filtered through a plug of silica. The silica was flushed with 10 % diethyl ether in petroleum ether and the solvent was removed under reduced pressure to give an orange solid. The orange solid was passed through a short column of silica gel using petroleum ether/diethyl ether (9:1) as the eluent to afford title compound **1** (4.00 g, 73 %) as a yellow solid; Found: C, 41.35, H, 4.89, N, 9.66. C5H7NO4 requires C, 41.38; H, 4.86; N, 9.65; m.p 36-38 oC; max (KBr disk): 3415, 1736, 1638, 1542 cm-1; H (200 MHz, CDCl3): 1.35 (3H, *t*, J = 7.0 Hz, OCH2CH3), 4.32 (2H, *q*, J = 7.0 Hz, OCH2CH3), 7.09 (1H, *d*, J = 13.6 Hz, H-2), 7.68 (1H, *d*, J = 13.6, H-3). C (75 MHz, CDCl3): 13.9 (OCH2CH3), 62.4 (OCH2CH3), 127.6 (C-2), 148.9(C-3), 162.6 (C-1); MS (EI): *m/z* 145 (M+), 100 (100%).

**3-nitro-7-oxa-bicyclo[2,2,1]hepta-5-ene-2-carboxylate**:

Furan (5.4 ml, 74mmol) was added to a solution of -unsaturated ester **1** (5.38g, 37mmol) in chloroform (20 ml) at 25oC. The reaction was stirred at 25oC for 16 h. Removal of the solvent under reduced pressure afforded a mixture of the *endo*-nitro isomer and the *exo*-nitro isomer (2:1) as a yellow oil. The oil was subjected to flash column chromatography using petroleum ether/diethyl ether (7:3) as the eluting solvent to afford the *Endo*-nitro adduct **2a** as a white solid (60%) and *Exo*-nitro isomer **3a** as yellow oil (30%). ***Ethyl endo-3-nitro-7-oxa-bicyclo[2,2,1]hepta-5-ene-exo-2-carboxylate* 2a** Found: C, 50.76; H, 5.14; N, 6.58. C9H11NO5 requires C, 50.70; H, 5.20; N, 6.57; mp 54-56oC; max (KBr disk): 2982, 1722, 1587 cm-1; H (300 MHz, CDCl3): 1.32 (3H, t, J = 7.2 Hz, OCH2CH3), 3.23 (1H, d, J = 3.0 Hz, H-2), 4.27 (2H, q, J = 7.2, OCH2CH3), 5.34 (1H, s, H-1), 5.48 (1H, d, J = 5.0 Hz, H-3), 5.54 (1H, dd, J = 5.0 and 4.0 Hz, H-4), 6.39 (1H, dd, J = 5.8 and 1.6 Hz, H-5), 6.73 (1H, dd, J = 5.8 and 1.6 Hz, H-6). C (75 MHz, CDCl3): 14.4 (OCH2CH3), 49.2 (C-2), 62.4 (OCH2CH3), 79.3 (C-4), 83.5 (C-1), 84.5 (C-3), 133.9 and 139.1 (C-5 and C-6), 169.9 (CO2C2H5); m/z (CI) 231 (MNH4+, 100%). ***Ethyl exo-3-nitro-7-oxa-bicyclo[2,2,1]hepta-5-ene-endo-2-carboxylate* 3a** max (Liq. Film): 2990, 1733, 1549 cm-1; H (300 MHz, CDCl3): 1.28 (3H, t, J = 7.2 Hz, OCH2CH3), 3.94 (1H, t, J = 3.8 and 2.8 Hz, H-2), 4.16 (2H, J = 7.2 Hz, OCH2CH3), 4.82 (1H, d, J = 2.8 Hz, H-1), 5.32 (1H, d, J = 3.8 Hz, H-3), 5.50 (1H, bs, H-4), 6.54 (2H, m, H-5 and H-6). C (75 MHz, CDCl3): 14.3 (OCH2CH3), 49.9 (C-2), 61.9 (OCH2CH3), 79.3 (C-4), 84.2 (C-1), 134.5 (C-6), 138.5 (C-5), 168.9 (CO2C2H5); m/z (CI) 231 (MNH4+); HRMS (CI): Found MNH4+, 231.1417. C9H15N2O5+ requires *M,* 231.1027.

**Ethyl *endo*-3-*tert*-butoxycarbonylamino-7-oxabicyclo[2,2,1]hept-5-ene-*exo*-2-carboxylate 2b**

Concentrated HCl (28 ml) was added to a solution of Diels-Alder adduct **2a** (3.5 g, 18 mmol) in EtOH (200 ml) at room temperature and this was followed by portionwise addition of zinc powder (26.6 g, 407 mmol). The mixture was stirred at room temperature for 12 hours and then filtered. The filtrate was treated with iPr2NEt (36.4 g, 282 mmol) and di-*tert*-butyldicarbonate (7.0 g, 32mmol). The mixture was stirred at 25 oC for 20 hours. The solvent was removed at reduced pressure to about 10 ml. The reduced solution was partitioned between ethyl acetate (50 ml), sat. NaHCO3 (30 ml) and water (30 ml). The organic layer was separated, dried (MgSO4) and removal of the solvent under reduced pressure gave a white solid which was purified by flash chromatography using petroleum ether/Et2O (7:3) as the eluent to give the title compound **2b** (406 mg, 89%) as a white solid, mp 88-90oC; max (KBr disk): 3353, 2982, 1737,1700 cm-1; H (500 MHz, CDCl3): 1.27 (3H, *t*, J = 7.2 Hz, OCH2CH3), 1.30 (9H, *s*, OC(CH3)3), 2.05 (1H, *d*, J = 3.0 Hz, H-2), 4.20 (2H, *q*, J = 7.2 Hz, OCH2CH3), 4.32 (1H, br, NH), 4.52 (1H, br, H-3), 5.08 (1H, br, H-4), 5.11 (1H, *s*, H-1), 6.46 (1H, *d*, J = 5.7 Hz, H-5), 6.59 (1H, *d*, J = 5.7 Hz, H-6); C (125 MHz, CDCl3): 14.5 (OCH2CH3), 28.7 (OC(CH3)3), 52.6 (C-2), 53.6 (C-3), 61.6 (OCH2CH3), 75.0 (C-4), 79.3 (OC(CH3)3), 82.4 (C-1), 134.7 (C-5), 138.0 (C-6), 157.4 (NCO2), 172 ( CO2C2H5); *m/z* (EI): 283 (M+), 57 (100%).

**Ethyl *exo*-3-*tert*-butoxycarbonylamino-7-oxabicyclo[2.2.1]hept-5-ene-*endo*-2-carboxylate 3b**

In an identical fashion *exo* nitro Diels-Alder adduct **3a** could be converted to the corresponding carbamate **3b**; Found C, 59.41; H, 7.46; N, 4.94; C14H21NO5 requires C, 95.35; H, 7.47; N, 4.94; mp 50-52 oC, max (KBr disk): 3291, 2978, 1738, 1703 cm-1; H (500 MHz, CDCl3): 1.24 (3H, *t*, J = 7.2 Hz, OCH2CH3), 1.45 (9H, *s*, OC(CH3)3), 2.69 (1H, *t*, J = 4.8 and 3.2 Hz, H-2), 4.02 (1H, *br*, H-3), 4.12 (2H, *q*, J = 7.2 Hz, OCH2CH3), 4.78 (1H, *s*, H-4), 4.82 (1H, *br*, NH), 5.12 (1H, *d*, J = 4.8 Hz, H-1), 6.37 (1H, *dd*, J = 5.2 and 1.6 Hz, H-5), 6.46 (1H, *dd*, J = 5.2 and 1.6 Hz, H-6); C (125 MHz, CDCl3): 14.0 (OCH2CH3), 28.2 (OC(CH3)3), 52.1 (C-2), 54.3 (C-3), 60.8 (OCH2CH3), 78.4 (C-1), 79.6 (C-3), 85.1 (C-4), 135.2 (C-6), 135.4 (C-5), 155.3 (NCO2), 170.2 (COC2H5); MS (EI): *m/z* 283(M+), 57(100%).

**Ethyl *trans*-6-tert-butoxycarbonylamino-5-hydroxy-1,3-cyclohexadiene-1-carboxylate 4**:

To a solution of KHMDS (530 mg, 2.64 mmol) in THF (10 ml) at –50 oC was added a solution of adduct **2b** (250 mg, 0.88 mmol) in THF (2.5 ml). The solution was then warmed up to room temperature (20 minutes) and quenched with a mixture of ethyl acetate and ethanol (50 ml, 19:1). The mixture was washed with sat. NH4Cl (25 ml), dried (MgSO4) and concentrated under reduced pressure. The resulting residue was purified by flash chromatography eluting with petroleum ether/ethyl acetate mixture (3:2) to give cyclohexadiene **4** (359 mg, 72%) as a pale yellow gum. Found: C, 59.20; H, 7.53; N, 4.80%; Calc. for C14H21NO5 C, 59.35; H, 7.47; N, 4.94%; max (KBr disk): 2979, 2931, 1716, 1700 1584 cm-1; H (500 MHz, CDCl3): 1.28 (3H, *t*, J = 7.0 Hz, OCH2CH3), 1.42 (9H, *s*, OC(CH3)3), 4.20 (2H, *q*, J = 7.0 Hz, OCH2CH3), 4.36 (1H, *s*, H-5), 4.48 (1H, br, NH), 4.76(1H, *m*, H-6), 6.26 (2H, *m*, H-3 and 4), 7.17 (1H, *d*, J = 4.8 Hz, H-2); C (125 MHz, CDCl3): 14.1 (OCH2CH3), 28.3 (OC(CH3)3), 50.0 (C-6), 60.8 (OCH2CH3), 67.7(C-5), 80.0 (OC(CH3)3), 124.5 (C-3), 132.6 (C-2), 133.5 (C-4), 155.4 (NCO2), 165.9 (CO2C2H5); MS m/z (CI): 284 (M+ + 1);.

**Ethyl *syn*-6-*tert*-butoxycarbonylamino-5-hydroxy-1,3-cyclohexadiene-1-carboxylate 5**: To a solution of KHMDS (1060 mg, 5.28 mmol) in THF (10 ml) at –50 oC was added a solution of adduct **3b** (500 mg, 1.67 mmol) in THF (2.5 ml). The solution was then warmed up to room temperature (20 minutes) and quenched with a mixture of ethyl acetate and ethanol (50 ml, 19:1). The mixture was washed with sat. NH4Cl (25 ml), dried (MgSO4) and concentrated under reduced pressure. The resulting residue was purified by flash chromatography eluting with petroleum ether/ethyl acetate mixture (3:2) to give cyclohexadiene **5** (340 mg, 68%) as a pale yellow gum; max (KBr disk): 3389 (br), 2982, 1689, 1523 cm-1; H (500 MHz, CDCl3): 1.28 (3H, *t*, J = 7.0 Hz, OCH2CH3), 1.42 (9H, *s*, OC(CH3)3), 3.48 (1H, br, OH), 4.22 (2H, *q*, J = 7.0 Hz, OCH2CH3), 4.64 (1H, *t*, J = 7.5 Hz, H-5), 4.67 (1H, br, NH), 4.77 (1H, *d*, J = 7.5 Hz, H-6), 6.05 (1H, *t*, J = 5.5 Hz, H-3), 6.11 (1H, *d*, J = 7.5 Hz, H-4), 7.10 (1H, *d*, J = 5.5 Hz, H-2); C (125 MHz, CDCl3): 14.4 (OCH2CH3), 28.5 (OC(CH3)3), 46.9 (C-6), 61.6 (OCH2CH3), 71.4 (C-5), 81.6 (OC(CH3)3), 122.2 (C-3), 127.9 (C-1), 135.2 (C-2), 138.8 (C-4), 157.5 (NCO2), 166.1 (CO2); *m/z* (CI): 284 (MH+, 13%), 182 (100%); HRMS (CI): Found MH+, 284.1486; C14H22NO5+ requires *M,* 284.1498.

**Ethyl *anti*-*anti*-3-acetoxy-2-*tert*-butoxycarbonylaminocyclohexanecarboxylate 6**:

Following the same protocol as described for **7**,acylation and reduction of cyclohexene **4** afforded ACHC derivative **6** as a colourless oil (75%) following purification by column chromatography; max (liq. film): 3367 (br), 2938, 1727, 1688, 1535 cm-1; H (500MHz, CDCl3): 1.23 (3H, *t*, J = 7.5 Hz, OCH2CH3), 1.40 (9H, *s*, OC(CH3)3), 1.52 and 1.77 (2H, *m*, HH-5), 1.54 and 1.87 (2H, *m*, HH-6), 1.55 and 2.05 (2H, *m*, HH-4), 2.08 (3H, *s*, CH3CO), 2.36 (1H, *dt*, J = 12.3 and 3.9 Hz, H-1), 3.22 (1H, br, OH), 3.42 (1H, br, H-3), 3.49 (1H, br, H-2), 4.12 (2H, *q*, J = 7.5 Hz, OCH2CH3), 4.81 (1H, br, NH); C (125 MHz, CDCl3): 14.4 (OCH2CH3), 23.1 (C-6), 28.5 (OC(CH3)3), 28.8 (C-5), 33.9 (C-4), 48.6 (C-1), 58.3 (C-2), 60.9 (OCH2CH3), 74.1 (C-3), 80.2 (OC(CH3)3), 157.0 (NCO2), 173.4 (CO2Et); *m/z* (CI): 330 (MH+, 53%), 232 (100%).

**Ethyl *syn*-*syn*-3-acetoxy-2-*tert*-butoxycarbonylaminocyclohexanecarboxylate 7**:

To a solution of cyclohexadiene **5** (500 mg, 1.77 mmol) in CH2Cl2 anhydrous pyridine (0.5 ml, 6.45 mmol) was added acetic anhydride (0.5 ml, 5.30 mmol). The reaction mixture was then stirred at room temperature for 20 hours. The solvent was removed under reduced pressure and the crude product was purified by flash chromatography eluting with petroleum ether/ethyl acetate (4:1) to give *ethyl syn-5-acetoxy-6-tert-butoxycarbonylamino-1,3-cyclohexadiene-1-carboxylate* as a yellow solid (449 mg, 78%); m.p. 76-78oC; max (KBr disk): 3330, 2984, 1710,1522 cm-1; H (500 MHz, CDCl3): 1.27 (3H, *t*, J = 7.0 Hz, OCH2CH3), 1.41 (9H, *s*, OC(CH3)3), 2.09 (3H, *s*, CH3CO), 4.25 (2H, *q*, J = 7.0 Hz, OCH2CH3), 4.56 (1H, *d*, J = 10.0 Hz, NH), 5.00 (1H, *dd*, J = 10.0 and 7.5 Hz, H-6), 5.66 (1H, *d*, J = 7.5 Hz, H-5), 6.00 (1H, *d*, J = 9.5 Hz, H-4), 6.16 (1H, *dd*, J = 9.5 and 5.5 Hz, H-3), 7.12 (1H, *d*, J = 5.5 Hz, H-2), C (125 MHz, CDCl3): 14.3 (OCH2CH3), 21.2 (CH3CO), 28.5 (OC(CH3)3), 43.7 (C-6), 61.2 (OCH2CH3), 71.6 (C-5), 79.7 (OC(CH3)3), 124.0 (C-3), 128.6 (C-1), 134.0 (C-2), 134.3 (C-4), 155.2 (NCO2), 165.8 (CO2), 170.5 (CH3CO); *m/z* (CI): 326 (MH+, 100%).

To a solution of *ethyl syn-5-acetoxy-6-tert-butoxycarbonylamino-1,3-cyclohexadiene-1-carboxylate* (250 mg, 0.77 mmol) in ethanol (20 ml) was added 10% Pd/C (100 mg) and the solution was stirred under hydrogen for 48 h. The reaction mixture was then filtered and the filtrate was concentrated under reduced pressure to give ACHC derivative **7** as a white solid (243 mg, 96%); m.p. 53-55 oC; max (KBr disk): 3373, 2982, 1744, 1715, 1524 cm-1; H (500 MHz, CDCl3): 1.23 (3H, *t*, J = 7.0 Hz, OCH2CH3), 1.40 (9H, *s*, OC(CH3)3), 1.56 (2H, *m* HH-5), 1.72 (2H, *m*, HH-4), 1.81 (2H, *m*, HH-6), 1.99 (3H, *s*, CH3CO), 2.62 (1H, *dd*, J = 10.5 and 5.5 Hz, H-1), 4.16 (2H, *q*, J = 7.0 Hz, OCH2CH3), 4.47 (1H, *m*, H-2), 4.83 (1H, *m*, H-3), 4.98 (1H, *br*, NH); C (125 MHz, CDCl3): 14.3 (OCH2CH3), 21.2 (C-6), 21.3 (CH3CO), 22.9 (C-4), 26.5 (C-5), 28.5 (OC(CH3)3), 43.9 (C-1), 49.8 (C-2), 60.9 (OCH2CH3), 72.4 (C-3), 79.6 (OC(CH3)3), 155.6 (NCO2), 170.5 and 172.7 (carbonyls); *m/z* (ES+): 352 (MNa+, 100%).

**N-Benzyl-[*anti*-*anti*-3-acetoxy-2-*tert*-butoxycarbonylaminocyclohexane-1-carboxyl]amide 8**:

A solution of *anti-anti-3-acetoxy-2-tert-butoxycarbonylaminocyclohexanecarboxylic acid* (250 mg, 1.09 mmol), benzylamine (0.14 ml, 1.31 mmol), and triethylamine in CH2Cl2 (10 ml) was treated with HATU (501 mg, 1.31 mmol) and the reaction was stirred for 16 h. 1 M HCl (20 ml) was added to the reaction mixture and the layers were separated. The organic layer was then dried (MgSO4), concentrated under reduced pressure and recrystalisation from ethyl acetate afforded **8** as a white solid (360 mg, 87%); m.p. 182-184 oC; max (KBr disk): 3450, 2933, 1734, 1689,1644 cm-1; H (500 MHz, CD3OD): 1.39 (9H, *s*, OC(CH3)3), 1.45 (2H, *m*, HH-4), 1.57 (2H, *m*, HH-5), 1.83 (2H, *m*, HH-6), 2.00 (3H, *s*, CH3CO), 2.45 (1H, *dt*, J = 11.6 and 3.2 Hz, H-1), 3.74 (1H, *t*, J = 11.6 Hz, H-2), 4.25 (1H, *d*, J = 14.8 Hz, NCH2Ph), 4.47 (1H, *d*, J = 14.8 Hz, NCH2Ph), 4.75 (1H, *m*, H-3), 7.28 (5H, *m*, aromatic protons); C (100 MHz, CD3OD): 19.9 (CH3CO), 22.8 (C-5), 27.6 (OC(CH3)3), 29.1 (C-6), 30.8 (C-4), 42.9 (NCH2Ph), 49.4 (C-1), 54.6 (C-2), 74.9 (C-3), 78.7 (OC(CH3)3), 126.9, 127.3, 128.4, 138.7 (Ph carbons), 156.5 (NCO2), 174.1 (NCO), 174.4 (CH3CO); *m/z* (ES+): 413 (MNa+)

**N-Cyclohexyl-[*anti*-*anti*-3-acetoxy-2-*tert*-butoxycarbonylamino-cyclohexanecarboxyl]amide 9**

Employing the same procedure as that described for the synthesis of **8** reaction of *anti-anti-3-acetoxy-2-tert-butoxycarbonylamino-cyclohexanecarboxylic acid* (250 mg, 1.09 mmol) with cyclohexylamine afforded **9** as a white solid (292 mg, 72%); m.p. 260-262 oC; max (KBr disk): 3311, 2933, 1738, 1693, 1645, 1547 cm-1; H (400 MHz, DMSO): 1.12 (1H, *m*, H-4’), 1.23 (4H, *m*, HH-3’ and 5’), 1.35 (9H, *s*, OC(CH3)3), 1.41 (2H, *m*, HH-5), 1.63 (4H, *m*, HH-2’ and 6’), 1.84 (4H, *m*, HH-4 and 6), 2.01 (3H, *s*, CH3CO), 2.53 (1H, *dd*, J = 9.0 and 10.2 Hz, H-1), 3.48 (2H, *m*, H-1’ and H-2), 4.57 (1H, *m*, H-3); C (100 MHz, DMSO): 21.4 (C-3’), 23.2 (C-6), 23.6 (C-4’), 24.8 (C-5’), 25.9 (C-5), 28.8 (OC(CH3)3), 31.2 (C-2’), 31.5 (C-6’), 32.8 (C-4), 38.9 (C-1), 46.4 (C-2), 48.3 (C-1’), 76.0 (C-3), 79.3 (OC(CH3)3), 152.3 (NCO2), 166.3 (NCO), 170.5 (CH3CO); *m/z* (ES+): 405 (MNa+).

**6-*tert*-butoxycarbonylamino-3,4-epoxy-5-hydroxycyclohex-1-ene-1-carboxylate**

To a solution of diene **4** (1.00 g, 3.53 mmol) in CH2Cl2 (20 ml) was added mCPBA (1.23 g, 7.06 mmol) and NaHCO3 (890 mg, 10.6 mmol). The mixture was stirred at room temperature for 36 hr. The mixture was then partitioned between concentrated NaHCO3 solution (25 ml) and ethyl acetate (25 ml) and the layers were separated. The aqueous layer was extracted with ethyl acetate (2 x 25 ml) and the organic extractions were mixed, dried (MgSO4) and concentrated under reduced pressure to give the crude product of 9:1 mixture of epoxides **10** as a colourless oil (721 mg, 68%) and **11** as a white gum (90 mg, 9%). The two isomers were separated by flash chromatography eluting with petroleum ether/ethyl acetate (7:4). *Ethyl anti-anti-6-tert-butoxycarbonylamino-3,4-epoxy-5-hydroxycyclohex-1-ene-1-carboxylate* **10**: max (thin film): 3439 (br), 2979, 1718, 1499 cm-1; H (500 MHz, CDCl3): 1.27 (3H, *t*, J = 7.0 Hz, OCH2CH3), 1.40 (9H, *s*, OC(CH3)3), 3.54 (1H, *t*, J = 4.0 Hz, H-3), 3.74 (1H, br, H-4), 4.24 (2H, *q*, J = 7.0 Hz, OCH2CH3), 4.41 (1H, br, H-5), 4.73 (1H, *d*, J = 10.0 Hz, NH), 4.87 (1H, *d*, J = 10.0 Hz, H-6), 7.32 (1H, *d*, J = 4.0 Hz, H-2); C (125 MHz, CDCl3): 14.3 (OCH2CH3), 28.6 (OC(CH3)3), 46.4 (C-3), 49.3 (C-6), 58.1 (C-4), 61.4 (OCH2CH3), 67.0 (C-5), 80.2 (OC(CH3)3), 133.0 (C-1), 137.3 (C-2), 155.3 (NCO2), 165 (CO2); *m/z* (CI): 300 (MH+, 25%), 261 (100%). *Ethyl syn-anti-6-tert-butoxycarbonylamino-3,4-epoxy-5-hydroxycyclohex-1-ene-1-carboxylate* **11**: max (thin film): 3435 (br), 2972, 1725, 1492 cm-1; H (500 MHz, CDCl3): 1.28 (3H, *t*, J = 7.0 Hz, OCH2CH3), 1.41 (9H, *s*, OC(CH3)3), 3.50 (1H, *t*, J = 4.0 Hz, H-3), 3.70 (1H, *dd*, J = 4.0 and 1.5 Hz, H-4), 4.18 (4H, *m*, OCH2CH3, H-5, and H-6), 5.49 (1H, br, NH), 6.92 (1H, *d*, J = 4.0 Hz, H-2); C (125 MHz, CDCl3): 14.3 (OCH2CH3), 28.5 (OC(CH3)3), 48.3 (C-3), 52.5 (C-6), 55.6 (C-4), 61.5 (OCH2CH3), 71.6 (C-5), 80.6 (OC(CH3)3), 130.1 (C-1), 133.4 (C-2), 156.7 (NCO2), 165.5 (CO2); *m/z* (CI): 300 (MH+, 20%), 166 (100%).

**Ethyl *anti*-*anti*-5-acetoxy-6-*tert*-butoxycarbonylamino-3,4-epoxy-5-acetoxycyclohex-1-ene-1-carboxylate 12**:

To a solution of cyclohexadiene **3** (500 mg, 1.77 mmol) in anhydrous pyridine (5 ml, 64.5 mmol) was added acetic anhydride (5 ml, 53.0 mmol). The reaction mixture was then stirred at room temperature for 20 hours. 2M HCl (20 ml) and ethyl acetate (20 ml) were added and the resulting layers were separated. The aqueous layer was extracted with ethyl acetate (2 x 20 ml) and the organic layers were combined, dried (MgSO4) and concentrated under reduced pressure. The crude product was purified by flash chromatography eluting with petroleum ether/ethyl acetate (4:1) to give *ethyl anti-5-acetoxy-6-tert-butoxycarbonylamino-1,3-cyclohexadiene-1-carboxylate* as a white solid (550 mg, 96%), mp 42-44oC; Found: C, 58.79; H, 7.11; N, 4.30; Calc. for C16H23NO6; C, 59.06; H, 7.13; N, 4.31%; max (KBr disk): 3285, 2983, 1737, 1717, 1679, 1648, 1527 cm-1; H (500 MHz, CDCl3): 1.30 (3H, t, J = 7.0 Hz, OCH2CH3), 1.42 (9H, s, OC(CH3)3), 2.00 (3H, s, CH3CO), 4.28 (2H, q, J = 7.0 Hz, OCH2CH3), 4.37 (1H, br, NH), 4.46 (1H, br, H-6), 5.25 (1H, br, H-5), 6.34 (2H, br, H-3 and 4), 7.17(IH, br, H-2); C (125 MHz, CDCl3): 14.1 (OCH2CH3), 20.8 (CH3CO), 28.2 (OC(CH3)3), 46.2 (C-6), 61.0 (OCH2CH3), 68.8 (C-5), 80.0 (OC(CH3)3), 126.6 and 127.8 (C-3 and 4) 128.7 (C-2), 133.1 (C-1), 154.6 (NCO2), 165.5 (CH3CO), 169.8 (CO2C2H5); MS m/z (CI): 326 (MH+, 100%). To a solution of *ethyl anti-5-acetoxy-6-tert-butoxycarbonylamino-1,3-cyclohexadiene-1-carboxylate* (200 mg, 0.59 mmol) in CH2Cl2 (10 ml) was added mCPBA (310 mg, 1.77 mmol) and NaHCO3 (300 mg, 3.52 mmol). The mixture was stirred at room temperature for 36 hours. The mixture was then partitioned between concentrated NaHCO3 solution (25 ml) and ethyl acetate and the layers were separated. The aqueous layer was extracted with ethyl acetate (2 x 25 ml) and the organic extractions were combined, dried (MgSO4) and concentrated under reduced pressure to give the crude product. Flash chromatography eluting with petroleum ether/ethyl acetate (7:3) gave the title epoxide **12** as a colourless oil (136 mg, 65%); Found: C, 56.27; H, 6.85; N, 4.11%; Calc. for C16H23NO7 C, 56.30; H, 6.79; N, 4.10%; max (thin film): 3442, 2979, 1653, 1494 cm-1; H (400 MHz, CDCl3): 1.25 (3H, *t*, J = 7.2 Hz, OCH2CH3), 1.38 (9H, *s*, OC(CH3)3), 2.00 (3H, *s*, CH3CO), 3.50 (1H, *dd*, J = 7.5 and 3.9 Hz, H-3), 3.79 (1H, *br*, H-4), 4.19 (2H, *q*, J = 7.2 Hz, OCH2CH3), 4.16 (1H, *d*, J = 9.9 Hz, NH), 4.87 (1H, *d*, J = 9.9 Hz, H-6), 5.32 (1H, *br*, H-5), 7.28 (1H, *br*, H-2); C (100 MHz, CDCl3): 14.3 (OCH2CH3), 21.0 (CH3CO), 28.5 (OC(CH3)3), 46.3 (C-3), 46.8 (C-6), 55.6 (C-4), 61.5 (OCH2CH3), 68.7 (C-5), 80.0 (OC(CH3)3), 133.4 (C-1), 136.6 (C-2), 154.4 (NCO2), 164.8 (CO2C2H5), 169.9 (CH3CO); MS *m/z* (CI): 342 (MH+), 303 (100%).

**Ethyl *syn*-*syn*-6-*tert*-butoxycarbonylamino-3,4-epoxy-5-hydroxycyclohex-1-ene-1-carboxylate 13**

To a solution of diene **5** (1.00 g, 3.53 mmol) in CH2Cl2 (20 ml) was added *m*CPBA (1.23 g, 7.06 mmol) and NaHCO3 (890 mg, 10.6 mmol). The mixture was stirred at room temperature for 36 hr. The mixture was then partitioned between concentrated NaHCO3 solution (25 ml) and ethyl acetate (25 ml) and the layers were separated. The aqueous layer was extracted with ethyl acetate (2 x 25 ml) and the organic extractions were mixed, dried (MgSO4) and concentrated under reduced pressure to give the crude product **13** as a white gum (865 mg, 82%); max (KBr disk): 3437, 2979, 1720, 1498 cm-1; H (500 MHz, CDCl3): 1.27 (3H, *t*, J = 7.5 Hz, OCH2CH3), 1.41 (9H, *s*, OC(CH3)3), 3.24 (1H, *br*, OH), 3.53 (1H, *dd*, J = 4.5 and 4.0 Hz, H-3), 3.67 (1H, *m*, H-4), 4.21 (3H, *m*, OCH2CH3 and H-5), 4.80 (1H, *d*, J = 8.5 Hz, NH), 4.98 (1H, *dd*, J = 8.5 and 4.5 Hz, H-6), 7.16 (1H, *d*, J = 4.0 Hz, H-2); C (125 MHz, CDCl3): 14.3 (OCH2CH3), 28.5 (OC(CH3)3), 47.8 (C-6), 48.3 (C-2), 59.0 (C-4), 61.6 (OCH2CH3), 68.4 (C-5), 80.2 (OC(CH3)3), 135.6 (C-1), 136.8 (C-2), 156.9 (NCO2), 164.7 (CO2); *m/z* (ES+): 322 (MNa+, 100%).

**Ethyl *anti*-*anti*-*anti*-3,4-diacetoxy-2-*tert*-butylcarbonylaminocyclohexane-1-carboxylate** **14**:

To a solution of epoxide **12** (100 mg, 0.29 mmol) in ethanol (10 ml) was added 10% Pd/C (20 mg) and the suspension was stirred under hydrogen for 48 h. The suspension was then filtered and the filtrate was concentrated under reduced pressure. The residue was dissolved in pyridine (2.5 ml) and treated with Ac2O (2.5 ml). After stirring for 24 h, 1 M HCl (10 ml) was added and the layers were separated. The organic layer was dried (MgSO4), concentrated under pressure and subjected to column chromatography eluting with petroleum ether/ethyl acetate (7:3) to give **14** as a colourless gum (98 mg, 99%); max (KBr disk): 3319, 2979, 1732, 1692, 1543 cm-1; H (500 MHz, CDCl3): 1.23 (3H, *t*, J = 7.0 Hz, OCH2CH3), 1.37 (9H, *s*, OC(CH3)3), 1.70 (1H, *m*, H-6), 1.94 (1H, *m*, H-6), 2.00 (3H, *s*, CH3CO), 2.02 (3H, *s*, CH3CO), 2.14 (2H, *m*, HH-5), 2.47 (1H, *dt*, J = 9.0 and 3.0 Hz, H-1), 3.88 (1H, *m*, H-2), 4.13 (2H, *q*, J = 7.0 Hz, OCH2CH3), 4.88 (1H, *d*, J = 9.5 Hz, H-3), 4.98 (1H, *m*, H-4); C (125 MHz, CDCl3): 14.3 (OCH2CH3), 20.9 and 21.2 (2 x CH3CO), 24.9 (C-6), 28.4 (OC(CH3)3), 28.8 (C-5), 48.5 (C-1), 54.1 (C-2), 61.3 (OCH2CH3), 72.6 (C-3), 75.0 (C-4), 79.9 (OC(CH3)3), 155.0 (NCO2), 170.3, 171.0, 172.2 (CO2 and 2 x CH3CO); *m/z* (CI): 405 (MNH4+, 71%), 388 (MH+, 36%), 349 (100%).

**Ethyl *anti*-*anti*-*syn*-3,4-diacetoxy-2-*tert*-butylcarbonylaminocyclohexane-1-carboxylate** **15**:

To a solution of epoxide **11** (100 mg, 0.33 mmol) in ethanol (10 ml) was added Pd/C (20 mg) under a hydrogen atmosphere and the mixture was stirred for 48 h. The solvent was then removed under reduced pressure and the residue was dissolved in pyridine (2.5 ml) and treated with Ac2O (2.5 ml). After stirring for 24 h, 2 M HCl (10 ml) was added to the reaction mixture and the layers were separated. The organic layer was dried (MgSO4), concentrated under reduced pressure and subjected to column chromatography eluting with petroleum ether/ethyl acetate (7:3) to give **15** as a white gum (107 mg, 84%); max (KBr disk): 3385, 2975, 1737, 1525 cm-1; H (500 MHz, CDCl3): 1.25 (3H, *t*, J = 7.2 Hz, OCH2CH3), 1.39 (9H, *s*, OC(CH3)3), 1.64 (1H, *m*, H-5), 1.81 (1H, *m*, H-6), 1.95 (2H, *m*, H-5 and 6), 2.01 (3H, *s*, CH3CO), 2.13 (3H, *s*, CH3CO), 2.51 (1H, *t*, J = 11.5 Hz, H-1), 4.16 (3H, *m*, OCH2CH3 and H-2), 4.45 (1H, *d*, J = 9.5 Hz, NH), 4.86 (1H, *dd*, J = 11.5 and 2.5 Hz, H-3), 5.32 (1H, br, H-4); C (125 MHz, CDCl3) 14.4 (OCH2CH3), 21.0 (CH3CO), 21.5 (CH3CO), 23.1 (C-6), 27.8 (C-5), 28.5 (OC(CH3)3), 48.8 (C-1), 50.7 (C-2), 61.2 (OCH2CH3), 69.4 (C-4), 73.3 (C-3), 79.7 (OC(CH3)3), 155.1 (NCO2), 170.6, 171.O, 172.8 (carbonyls); *m/z* (CI): 388 (MH+, 100%).

**Ethyl *syn*-*syn*-*syn*-3-acetoxy-2-*tert*-butylcarbonylamino-4-hydroxycyclohexane-1-carboxylate** **16**:

Following acylation by the standard protocol, epoxide **13** (100 mg, 0.29 mmol) in ethanol (10 ml) was added 10% Pd/C (20 mg) and the suspension was stirred under hydrogen for 48 h. The suspension was then filtered and the filtrate was concentrated under reduced pressure to give **16** as a colourless gum (97 mg, 97%) max (KBr disk): 3438, 3374, 2975, 1729, 1699, 1513 cm-1; H (500 MHz, CDCl3): 1.23 (3H, *t*, J = 7.0 Hz, OCH2CH3), 1.40 (9H, *s*, OC(CH3)3), 1.57 (1H, *m*, H-5), 1.63 (1H, *m*, H-6), 2.02 (2H, *m*, H-5 and 6), 2.07 (3H, *s*, CH3CO), 2.60 (1H, *m*, J = 11.5 and 3.5 Hz, H-1), 4.07 (2H, *m*, H-4 and OH), 4.13 (2H, *q*, J = 7.0 Hz, OCH2CH3), 4.52 (1H, br, H-2), 4.85 (1H, *m*, H-3), 5.72 (1H, br, NH); C (125 MHz, CDCl3): 14.3 (OCH2CH3), 17.4 (C-6), 21.2 (CH3CO), 28.5 (OC(CH3)3), 28.9 (C-5), 44.4 (C-1), 50.0 (C-2), 61.0 (OCH2CH3), 68.9 (C-4), 72.6 (C-3), 79.4 (OC(CH3)3), 155.9 (NCO2), 170.2 (CO2), 172.3 (CH3CO); *m/z* (ES+): 368 (MNa+).

**Ethyl *endo*-3-*tert*-butoxycarbonylamino-5,6-O,O-bis(tert-butyldimethylsilyl)-5,6-dihydroxy-7-oxabicyclo[2,2,1]heptane-*exo*-2-carboxylate 17**

The diol (500 mg, 1.58 mmol), obtained following standard dihydroxylation of **2b**,was dissolved in anhydrous DMF (20 ml) and treated with DMAP (583 mg, 4.78 mmol) and TBSCl (600 mg, 4.00 mmol). The mixture was then stirred over night, quenched with sat. NH4Cl solution (10 ml), and extracted with ethyl acetate (10 ml x 3). The combined organic extracts were washed with water (10 ml), dried (MgSO4) and concentrated to leave a residue, which was purified by flash chromatography eluting with petroleum ether/(CH3CH2)2O (7:3) to give disilyl ether **17** as a white solid (860 mg, 86%), mp 150-152oC; Found: C, 57.14; H, 9.38; N, 2.59% Calc. for C26H51NO7Si2: C, 57.21; H, 9.42; N, 2.57%; max (KBr disk): 3372, 2959, 1737, 1699, 1677, 1520 cm-1; H (500 MHz, CDCl3): 0.09, 0.12 (12H, *s*, 2 x Si(CH3])2), 0.91 (18H, *s*, 2 x SiC(CH3)3), 1.26 (3H, *t*, J = 7.0 Hz, OCH2CH3), 1.44 (9H, *s*, OC(CH3)3), 2.08 (1H, *d*, J = 4.6 Hz, H-2), 3.92 (1H, *d*, J = 5.3 Hz, H-6), 4.09 (1H, br, H-3), 4.18 (1H, *q*, J = 7.0 Hz, OCH2CH3), 4.25 (1H, br, H-5), 3.47 (1H, *s*, H-1), 4.52 (1H, br, H-4), 4.63 (1H, br, NH); C (125 MHz, CDCl3): -4.9, -5.0 (2 x Si(CH3)2), 14.1 (OCH2CH3), 18.5, 18.6 (2 x SiC(CH3)3), 26.0 (SiC(CH3)3), 28.3 (OC(CH3)3), 49.8 (C-2), 53.2 (C-3), 61.4 (OCH2CH3), 71.6 (C-5), 77.3 (C-6), 80.3 (C-4), 80.4 (OC(CH3)3), 85.4 (C-1), 155.4 (NCO2), 171.1 (CO2C2H5); MS (EI): *m/z* 547(M+), 376 (100 %).

**Ethyl *syn*-*anti*-*anti*-6-*tert*-butoxycarbonylamino-3,4,5-trihydroxycyclohex-1-ene-1-carboxylate 18**

Using the general procedure for OsO4 dihydroxylation, Me3NO.H2O (93 mg, 0.84 mmol), 4% wt. OsO4 in water (50 ml) and diene **4** (120 mg, 0.42 mmol) gave a crude product which was subjected to column chromatography eluting with petroleum ether/ethyl acetate (7:3) to give **18** as a colourless oil (104 mg, 78%); max (thin film): 3424, 2980, 1710,1513 cm-1; H (400MHz, CDCl3): 1.26 (3H, *t*, J = 6.8 Hz, OCH2CH3), 1.40 (9H, *s*, OC(CH3)3), 3.83 (1H, br, H-4), 4.05 (1H, br, H-5), 4.18 (2H, *q*, J = 6.8 Hz, OCH2CH3), 4.35 (1H, *m*, H-6), 4.45 (1H, br, H-3), 5.61 (1H, br, NH), 6.82 (1H, *s*, H-2); C (100 MHz, CDCl3): 14.3 (OCH2CH3), 28.6 (OC(CH3)3), 51.5 (C-6), 61.3 (OCH2CH3), 66.0 (C-3), 70.5 (C-4), 71.7 (C-5), 80.2 (OC(CH3)3), 131.7 (C-1), 132.2 (C-2), 156.3 (NCO2), 166.3 (CO2Et); *m/z* (CI): 318 (MH+, 49%), 182 (100%).

**Ethyl *syn*-*syn*-*anti*-6-amino-3,4-*bis*-(*tert*-butyldimethylsilyloxy)-5-hydroxycyclohex-1-ene-1-carboxylate 19**

To a solution of LiHMDS (231 mg, 1.38 mmol) in THF (20 ml) at –50oC was added a solution of oxanorbornene **17** (250 mg, 0.46 mmol) in THF (5 ml). The solution was stirred at 25oC for 2 hours. The reaction mixture was then quenched with ethyl acetate/ethanol (9:1) and stirred for 5 minutes. Saturated NH4Cl solution was added to the reaction mixture and the resulting two layers were separated. The organic layer was dried (MgSO4) and concentrated under reduced pressure to give the crude product. Flash chromatography eluting with ethyl acetate/petroleum ether (3:2) afforded **19** as a light yellow oil (98 mg, 48%); max (KBr disk): 3410, 2985, 1734, 1538 cm-1; H (400 MHz, CDCl3): 0.14 (12H, *s*, 2 x Si(CH3)3), 0.90 (9H, *s*, SiC(CH3)3), 0.91 (9H, *s*, SiC(CH3)3), 1.33 (3H, *t*, J = 7.2Hz, OCH2CH3), 3.25 (1H, br, OH), 4.02 (1H, *dd*, J = 5.6 and 5.0 Hz, H-5), 4.08 (1H, *dd*, J = 7.4 and 5.6 Hz, H-6), 4.13 (1H, *t*, J = 2.4 Hz, H-4), 4.26 (2H, *q*, J = 7.2 Hz, OCH2CH3), 4.41 (1H, *dd*, J = 3.2 and 2.4 Hz, H-3), 4.68 (2H, br, NH2), 6.87 (1H, d, J = 3.2 Hz, H-2); C (100 MHz, CDCl3): 0.1 (Si(CH3)2), 18.8 (OCH2CH3), 23.0 (SiC(CH3)3), 30.6 (SiC(CH3)3), 55.8 (C-6), 66.3 (OCH2CH3), 73.8 (C-3), 76.4 (C-4), 77.4 (C-5), 118.7 (C-1), 132.1 (C-2), 170.2 (CO2). *m/z* (CI): 446 (MH+, 8%), 297 (100%).

**Ethyl *syn*-*syn*-*syn*-3,4,5-triacetoxy-6-*tert*-butoxycarbonylaminocyclohex-1-ene-1-carboxylate 20**:

To a solution of **5** (120 mg, 0.23 mmol) in acetone (15 ml) was added Me3NO.H2O (52 mg, 0.47 mmol) and 4 wt % OsO4 in water (50 ml). The resulting mixture was stirred and monitored by TLC until all the starting material was consumed (12 hours). The solvent was then removed under reduced pressure and the residue was dissolved in ethyl acetate (10 ml). The acetate solution was washed with saturated NaHSO3 (5 ml) and the aqueous phase was extracted with ethyl acetate (5 ml x 3). The organic layers were combined, dried over MgSO4 and the solvent was removed under reduced pressure. Subsequently, the residue was dissolved in pyridine (2.5 ml, 31.0 mmol) and acetic anhydride (2.5 ml, 26.5 mmol) and stirred at room temperature for 16 h. Water (20 ml) was then added and the mixture was stirred for further 3 h. The mixture was extracted with ethyl acetate (3 x 20 ml). The combined organic extracts were washed with 2M HCl (30 ml), sat. NaHCO3 (30 ml) and water (30 ml), dried (MgSO4) and concentrated under reduced pressure. The residue was purified by flash chromatography eluting with petroleum ether/ethyl acetate (7:3) to afford title ester **20** (110 mg, 75%) as a white gum; max (KBr disk): 3463, 2980, 1755, 1721, 1507 cm-1; H (500 MHz, CDCl3): 1.28 (3H, *t*, J = 7.0 Hz, OCH2CH3), 1.44 (9H, *s*, OC(CH3)3), 2.04 (3H, *s*, CH3CO), 2.06 (3H, *s*, CH3CO), 2,14 (3H, *s*, CH3CO), 4.26 (2H, *q*, J = 7.0 Hz, OCH2CH3), 4.85 (1H, br, NH), 5.07 (2H, *m*, H-4 and 6), 5.61 (2H, *m*, H-3 and 5), 6.75 (1H, br, C-2); C (125 MHz, CDCl3): 14.3 (OCH2CH3), 20.8 (2 x CH3CO), 21.1 (CH3CO), 28.5 (OC(CH3)3), 45.1 (C-6), 61.7 (OCH2CH3), 66.8 (C-4), 67.9 (C-3), 68.7 (C-5), 79.7 (OC(CH3)3), 132.2 (C-1), 136.1 (C-2), 155.2 (NCO2), 164.5 (CO2), 169.6, 169.7, 169.9 (3 x CH3CO); *m/z* (ES+): 466 (MNa+); HRMS (ES+) Found MNa+, 466.1679. C20H29NO10Na+ requires *M,* 466.1689.

**Ethyl *anti*-*anti*-*anti*-*syn*-3,4,5-triacetoxy-2-*tert*-butoxycarbonylaminocyclohexanecarboxylate 21**:

**166** (100mg, 0.30 mmol) was dissolved in pyridine (2.5 ml, 31.0 mmol) and acetic anhydride (2.5 ml, 26.5 mmol) and stirred at room temperature for 16 h. Water (20 ml) was then added and the mixture was stirred for further 3 h. The mixture was extracted with ethyl acetate (3 x 20 ml). The combined organic extracts were washed with 2M HCl (30 ml), sat. NaHCO3 (30 ml) and water (30 ml), dried (MgSO4) and concentrated under reduced pressure. The residue was purified by flash chromatography eluting with petroleum ether/ethyl acetate (7:2) to give *ethyl syn-anti-anti-3,4,5-triacetoxy-6-tert-butoxycarbonylamino-cyclohex-1-ene-1-carboxylate*as a thick yellow oil (127 mg, 68%). Found: C, 54.23; H, 6.52; N, 3.18; Calc. for C20H29NO10: C, 54.42; H, 6.59; N, 3.16. H (500 MHz, CDCl3): 1.28 (3H, *t*, J = 7.2 Hz, OCH2CH3), 1.42 (9H, *s*, OC(CH3)3), 2.07 (9H, *s*, 3 x CH3CO), 4.23 (2H, *q*, J = 7.2 Hz, OCH2CH3), 4.42 (1H, br, NH), 4.70 (1H, br, H-6), 5.26 (1H, br, H-5), 5.32 (1H, *dd*, J = 6.6 and 4.2 Hz, H-4), 5.67 (1H, *t*, J = 3.6 Hz , H-3), 6.76 (1H, br, H-2); C (125 MHz, CDCl3): 14.0 (OCH2CH3), 20.5 and 20.7 (3 x CH3CO), 28.2 (OC(CH3)3), 48.3 (C-6), 61.4 (OCH2CH3), 65.6 (C-3), 66.1 (C-4), 70.2 (C-5), 79.9 (OC(CH3)3), 133.0 (C-1), 134.3 (C-2), 154.4 (NCO2), 164.6 (CO2C2H5), 169.1, 169.3 and 169.8 (3 x CH3CO); *m/z* (CI): 444 (MH+). Using the general hydrogenation procedure, *ethyl syn-anti-anti-3,4,5-triacetoxy-6-tert-butoxycarbonylamino-cyclohex-1-ene-1-carboxylate* was converted to the triacetate **21** H (500 MHz, CDCl3): 1.29 (3H, *t*, J = 7.0 Hz, OCH2CH3), 1.40 (9H, *s*, OC(CH3)3), 1.74 and 1.96 (2H, *m*, 6-HH), 2.93 (1H, *dd*, J = 8.5 and 4.4 Hz, H-1), 3.94 (1H, br, H-5), 4.11 (2H, *q*, J = 7.0 Hz, OCH2CH3), 4.22 (1H, br, H-4), 4.53 (1H, br, H-3), 4.59 (1H, br, H-2), 5.64 (1H, br, NH); C (125 MHz, CDCl3): 14.4 (OCH2CH3), 21.0 (3 x CH3CO), 24.9 (C-6), 28.4 (OC(CH3)3), 41.8 (C-1), 48.5 (C-5), 54.1 (C-2), 61.5 (OCH2CH3), 77.0 (C-4), 79.8 (H-3), 81.2 (OC(CH3)3), 155.0 (NCO2), 169.8 (CO2), 171.1, 172.8 and 173.2 (3 x CH3CO); *m/z* (CI): 463 (MNH4+, 3%), 446 (MH+, 5%), 346 (100%), 232 (93%). HRMS (ES+): Found MNa+ 468.1849, C17H25NO9Na requires *M,* 468.1846.

**Ethyl *anti*-*anti*-*syn*-*syn*-3,4,5-triacetoxy-2-N-acetylaminocyclohexane-1-carboxylate 22**

*Tetra*-n-butylammonium fluoride (0.5 ml of 1M solution in THF, 0.5 mmol) was added to a stirred solution of disilyl ether **19** (90 mg, 0.20 mmol) in THF (2.5 ml). After 16 hours, the mixture was concentrated under reduced pressure to afford yellow oil. The oil was dissolved in pyridine (1.5 ml, 18.6 mmol) and acetic anhydride (1.5 ml, 15.9 mmol) and the solution was stirred for 20 hours. Water (5 ml) and ethyl acetate (10 ml) were added to the reaction mixture and the resulting layers were separated. The aqueous layer was extracted with ethyl acetate (2 x 10 ml). The organic extracts were combined, washed with 2M HCl (10 ml), saturated NaHCO3 (10 ml), water (10ml), dried (MgSO4) and concentrated under reduced pressure. The residue was purified by flash chromatography eluting with petroleum ether/ethyl acetate (7:3) to give *ethyl syn-syn-anti-3,4,5-triacetoxy-6-N-acetylaminocyclohex-1-ene-1-carboxylate*as a yellow gum (41 mg, 52%). max (KBr disk): 3343, 2977, 1711, 1639, 1521 cm-1; H (500 MHz, CDCl3): 1.27 (3H, *t*, J = 7.2 Hz, OCH2CH3), 1.97 (3H, *s*, CH3CO), 2.03 (3H, *s*, CH3CO), 2.06 (3H, *s*, CH3CO), 2.15 (3H, *s*, CH3CO), 4.25 (2H, *q*, J = 7.2 Hz, OCH2CH3), 5.13 (1H, *dd*, J = 5.5 and 2.0 Hz, H-5), 5.44 (1H, br H-6), 5.62 (1H, br, H-4), 5.65 (2H, *m*, H-3 and NH), 6.79 (1H, br, H-2); C (125 MHz, CDCl3): 14.3 (OCH2CH3), 20.7 (CH3CO), 20.8 (CH3CO), 21.2 (CH3CO), 23.5 (CH3CO), 43.6 (C-6), 61.8 (OCH2CH3), 66.4 (C-5), 67.8 (C-3), 68.8 (C-4), 132.0 (C-1), 136 (C-2), 164.3 , 169.2, 169.6, 169.8 (carbonyls); *m/z* (CI): 386 (MH+, 100%). To a solution of *ethyl syn-syn-anti-3,4,5-triacetoxy-6-N-acetylaminocyclohex-1-ene-1-carboxylate*(100 mg, 0.26 mmol) in ethanol (10 ml) was added 10% Pd/C (20 mg) and the suspension was stirred under hydrogen for 24 h. The suspension was then filtered and the filtrate was concentrated under reduced pressure to give **22** as a colourless gum (98 mg, 99%); max (KBr disk): 3408, 2982, 1741, 1668, 1538 cm-1; H (400 MHz, CDCl3): 1.23 (3H, *s*, J = 7.2 Hz, OCH2CH3), 1.97 (3H, *s*, CH3CO), 2.00 (3H, *s*, CH3CO), 2.01 (3H, *s*, CH3CO), 2.10 (2H, *m*, HH-6), 2.19 (3H, *s*, CH3CO), 2.75 (1H, *dd*, J = 10.2 and 9.2 Hz, H-1), 4.12 (2H, *q*, J = 7.2 Hz, OCH2CH3), 4.91 (1H, *m*, H-3), 4.92 (1H, *m*, H-2), 4.96 (1H, *m*, H-4), 5.54 (1H, *m*, H-5), 6.24 (1H, br, NH); C (100 MHz, CDCl3): 14.2 (OCH2CH3), 20.9 (CH3CO), 21.0 (CH3CO), 21.2 (2 x CH3CO), 23.7 (C-6), 38.5 (C-1), 47.2 (C-2), 61.7 (OCH2CH3), 68.0 (C-4), 68.6 (C-3), 70.6 (C-5), 169.1, 169.6, 169.8, 170.0, 170.9 (carbonyls); *m/z* (CI): 388 (MH+, 100%). HRMS (ES+): Found: 410.1388; C17H25NO9Na requires *M*, 410.1427.

**Ethyl *syn*-*syn*-*syn*-*syn*-3,4,5-triacetoxy-2-*tert*-butoxycarbonylaminocyclohexane carboxylate 23**:

To a solution of cyclohexene **20** (100 mg, 0.26 mmol) in ethanol (10 ml) was added 10% Pd/C (20 mg) and the suspension was stirred under hydrogen for 24 h. The suspension was then filtered and the filtrate was concentrated under reduced pressure to give **23** as a yellow oil (98 mg, 98%); max (thin film): 3455, 2979, 1747, 1513 cm-1; H (500 MHz, CDCl3): 1.22 (3H, *t*, J = 7.5 Hz, OCH2CH3), 1.41 (9H, *s*, OC(CH3)3), 2.00 (3H, *s*, CH3CO), 2.01 (6H, *s*, 2 x CH3CO), 2.06 (2H, *m*, HH-6), 2.16 (3H, *s*, CH3CO), 2.73 (1H, *m*, H-1), 4.22 (2H, *q*, J = 7.5 Hz, OCH2CH3), 4.63 (1H, *m*, H-2), 4.87 (2H, *m*, H-4 and 5), 5.16 (1H, *d*, J = 11.0 Hz, NH), 5.53 (1H, *s*, H-3); C (125 MHz, CDCl3): 14.2 (OCH2CH3), 20.8 (CH3CO), 21.0 (2 x CH3CO), 22.8 (C-6), 28.5 (OC(CH3)3), 41.8 (C-1), 48.7 (C-2), 61.5 (OCH2CH3), 68.6 (C-4), 68.7 (C-5), 70.5 (C-3), 79.7 (OC(CH3)3), 155.8 (NCO2), 169.4, 169.7, 170.1, 170.8 (carbonyls); *m/z* (ES+): 468 (MNa+); HRMS (ES+): Found MNa+, 468.1860. C20H31NO10Na+ requires *M,* 468.1846.

**Ethyl *anti*-*anti*-*anti*-*anti*-3,4,5-triacetoxy-2-N-acetylaminocyclohexane-1-carboxylate 24**

A solution of epoxide **12** (270 mg, 0.79 mmol) in H2O/Acetone (1:1) was treated with HClO4 (5 ml, 0.08 mmol). The solution was stirred at room temperature for 24 h and the solvent was removed under reduced pressure. The residue was stirred in pyridine (5 ml) and acetic anhydride (5 ml) for 24 h and then partitioned between 2M HCl (20 ml) and ethyl acetate (20 ml). The organic layer was washed with saturated NaHCO3 (20 ml), dried (MgSO4) and concentrated under reduced pressure. The resulting residue was columned using petroleum ether/ ethyl acetate (7:3) as the eluting solvent to give *ethyl anti-anti-anti-3,4,5-triacetoxy-2-N-acetylaminocyclohex-1-ene-1-carboxylate* **27** as a pale yellow gum (226 mg, 74%); max (KBr disk): 3387, 2935, 1752, 1663, 1537 cm-3; H (500 MHz, CDCl3): 1.27 (3H, *t*, J = 7.0 Hz, OCH2CH3), 1.93 (3H, *s*, CH3CO), 2.05 (3H, *s*, CH3CO), 2.06 (3H, *s*, CH3CO), 2.08 (3H, *s*, CH3CO), 4.21 (2H, *q*, J = 7.0 Hz, OCH2CH3), 5.01 (1H, *m*, H-6), 5.32 (2H, *m*, H-4 and H-5), 5.58 (1H, br, NH), 6.72 (1H, *d*, J = 4.5 Hz, H-2); C (125 MHz, CDCl3): 14.3 (OCH2CH3), 20.9, 21.0 and 23.4 (4 x CH3CO), 49.7 (C-6), 61.7 (OCH2CH3), 69.7 (C-3), 70.4 and 71.3 (C-4 and C-5), 132.0 (C-1), 135.0 (C-2), 164.6 (CO2), 169.6, 169.7, 170.1 and 170.4 (4 x CH3CO); *m/z* (CI): 386 (MH+), 208 (100%). To a solution of *ethyl anti-anti-anti-3,4,5-triacetoxy-2-N-acetylaminocyclohex-1-ene-1-carboxylate*(100 mg, 0.26 mmol) in ethanol (10 ml) was added 10% Pd/C (20 mg) and the suspension was stirred under hydrogen for 24 h. The suspension was then filtered and the filtrate was concentrated under reduced pressure to give **24** as a white gum (98 mg, 98%); max (KBr disk): 3247, 2947, 1741, 1660, 1565 cm-1; H (500 MHz, CDCl3): 1.23 (3H, *t*, J = 7.0 Hz, OCH2CH3), 1.88 (1H, *m*, H-6), 1.90 (3H, *s*, CH3CON), 2.01 (3H, *s*, CH3CO), 2,03 (3H, *s*, 2 x CH3CO), 2.28 (1H, *t*, J = 13.0 Hz, H-6), 2.57 (1H, *dt*, J = 13.0 and 3.5 Hz, H-1), 4.12 (2H, *q*, J = 7.0 Hz, OCH2CH3), 4.33 (1H, *q*, J = 10.0 Hz, H-2), 4.88 (1H, *m*, H-5), 4.96 (1H, *t*, J = 10.0 Hz, H-3), 5.21 (1H, *t*, J = 10.0 Hz, H-4), 5.49 (1H, *d*, J = 10.0 Hz, NH); C (125 MHz, CDCl3): 14.3 (OCH2CH3), 20.9 and 21.1 (3 x CH3CO), 23.4 (CH3CON), 30.3 (C-6), 44.4 (C-1), 52.5 (C-2), 61.8 (OCH2CH3), 70.6 (C-5), 72.9 (C-4), 73.2 (C-3), 169.8, 170.4, 170.8 and 171.3 (carbonyls); *m/z* (CI): 388 (MH+, 100%); HRMS (ES+): Found: 410.1467; C17H25NO9Na requires M+, 410.1427.

**Ethyl *anti*-*anti*-*syn*-*anti*-3,4,5-triacetoxy-2-N-acetylaminocyclohexane-1-carboxylate 25**

A solution of epoxide **11** (270 mg, 0.79 mmol) in H2O/Acetone (1:1) was treated with HClO4 (5 ml, 0.08 mmol). The solution was stirred at room temperature for 24 h and the solvent was removed under reduced pressure. The residue was stirred in pyridine (5 ml) and acetic anhydride (5 ml) for 24 h and then partitioned between 2M HCl (20 ml) and ethyl acetate (20 ml). The organic layer was washed with saturated NaHCO3 (20 ml), dried (MgSO4) and concentrated under reduced pressure. The resulting residue was columned using petroleum ether/ ethyl acetate (7:3) as the eluting solvent to give *ethyl anti-syn-anti-3,4,5-triacetoxy-6-N-acetylaminocyclohex-1-ene-1-carboxylate*as a pale yellow gum (226 mg, 74%); max (KBr disk): 3379, 2996, 1744, 1663, 1543 cm-1; H (500 MHz, CDCl3): 1.26 (3H, *t*, J = 7.0 Hz, OCH2CH3), 1.97 (3H, *s*, CH3CO), 2.01 (3H, *s*, CH3CO), 2.06 (3H, *s*, CH3CO), 2.08 (3H, *s*, CH3CO), 4.27 (2H, *q*, J = 7.0 Hz, OCH2CH3), 4.97 (1H, *dd*, J = 8.5 and 3.5 Hz, H-6), 5.28 (1H, *dd*, J = 8.5 and 2.5 Hz, H-4), 5.39 (1H, *dd*, J = 8.5 and 3.5 Hz, H-5), 5.57 (1H, *dd*, J = 8.5 and 2.5 Hz, H-3), 5.85 (1H, *d*, J = 8.5 Hz, NH), 6.87 (1H, *d*, J = 2.5 Hz, H-2); C (125 MHz, CDCl3): 14.3 (OCH2CH3), 21.0 (CH3CO), 21.1 (2 x CH3CO), 23.3 (CH3CO), 47.7 (C-6), 61.8 (OCH2CH3), 68.9 (C-4), 69.0 (C-3), 70.4 (C-5), 130.5 (C-1), 138.0 (C-2), 164.6, 169.6, 169.7 and 170.5 (carbonyls); *m/z* (CI): 386 (MH+, 100%).To a solution of *ethyl anti-syn-anti-3,4,5-triacetoxy-6-N-acetylaminocyclohex-1-ene-1-carboxylate*(100 mg, 0.26 mmol) in ethanol (10 ml) was added 10% Pd/C (20 mg) and the suspension was stirred under hydrogen for 48 h. The suspension was then filtered and the filtrate was concentrated under reduced pressure to give **195** as a colourless gum (98 mg, 99%); max (KBr disk): 3379, 2981, 1743, 1549 cm-1; H (500 MHz, CDCl3):1.24 (3H, t, J = 7.0 Hz, OCH2CH3), 1.90 (3H, *s*, CH3CO), 2.00 (3H, *s*, CH3CO), 2.03 (1H, *m*, H-6), 2.10 (3H, *s*, CH3CO), 2.16 (3H, *s*, CH3CO), 2.17 (1H, *m*, H-6), 2.71 (1H, *dt*, J = 11.5 and 4.0 Hz, H-1), 4.14 (2H, *q*, J = 7.0 Hz, OCH2CH3), 4.52 (1H, *q*, J = 11.5 Hz, H-2), 5.04 (1H, *m*, H-5), 5.14 (1H, *dd*, J = 11.5 and 3.0 Hz, H-3), 5.25 (1H, *t*, J = 3.0 Hz, H-4), 5.50 (1H, *d*, J = 11.5 Hz, NH); C (125 MHz, CDCl3): 14.4 (OCH2CH3), 21.0 (CH3CO), 21.3 (CH3CO), 23.5 (CH3CO), 27.8 (C-6), 43.8 (C-1), 49.4 (C-2), 61.6 (OCH2CH3), 68.6 (C-5), 68.8 (C-4), 70.3 (C-3), 169.4, 169.8, 170.0, 171.3 and 171.8 (carbonyls); *m/z* (CI): 388 (MH+, 100%); HRMS (ES+): Found M+, 410.1417. C17H25NO9 requires *M*, 410.1427.

**Ethyl *anti*-*syn*-*syn*-*anti*-3,4,5-triacetoxy-2-N-acetylaminocyclohexane-1-carboxylate 26**

A solution of epoxide **13** (270 mg, 0.79 mmol) in H2O/Acetone (1:1) was treated with HClO4 (5 ml, 0.08 mmol). The solution was stirred at room temperature for 24 h and the solvent was removed under reduced pressure. The residue was stirred in pyridine (5 ml) and acetic anhydride (5 ml) for 24 h and then partitioned between 2M HCl (20 ml) and ethyl acetate (20 ml). The organic layer was washed with saturated NaHCO3 (20 ml), dried (MgSO4) and concentrated under reduced pressure. The resulting residue was columned using petroleum ether/ ethyl acetate (7:3) as the eluting solvent to give *ethyl anti-syn-syn-3,4,5-triacetoxy-2-N-acetylaminocyclohex-1-ene-1-carboxylate*as a pale yellow gum (218 mg, 72%); max (KBr disk):3377, 2989, 1745, 1675, 1535 cm-1; H (500 MHz, CDCl3): 1.26 (3H, *t*, J = 7.0 Hz, OCH2CH3), 1.96 (3H, *s*, CH3CON), 2.08 (3H, *s*, CH3CO), 2.09 (3H, *s*, CH3CO), 2.10 (3H, *s*, CH3CO), 4.23 (2H, *q*, J = 7.0 Hz, OCH2CH3), 5.22 (1H, *dd*, J = 5.5 and 2.0 Hz, H-4), 5.46 (2H, *m*, H-5 and 6), 5.58 (2H, *m*, H-3 and NH), 6.82 (1H, *d*, J = 2.5 Hz, H-2); C (125 MHz, CDCl3): 14.3 (OCH2CH3), 21.0 (CH3CO) 21.1 (2 x CH3CO), 23.4 (CH3CON), 44.8 (C-6), 61.8 (OCH2CH3), 68.0 (C-3), 68.4 (C-5), 70.6 (C-4), 133.2 (C-1), 135.0 (C-2), 164.9 (CH3CON), 169.1, 169.3, 169.9, 170.0 (carbonyls); *m/z* (ES+): 408 (MNa+, 100%). To a solution of *ethyl anti-syn-syn-3,4,5-triacetoxy-2-N-acetylaminocyclohex-1-ene-1-carboxylate*(100 mg, 0.26 mmol) in ethanol (10 ml) was added 10% Pd/C (20 mg) and the suspension was stirred under hydrogen for 24 h. The suspension was then filtered and the filtrate was concentrated under reduced pressure to give **26** as a white solid (98 mg, 98 %); m.p. 196-198oC; max (KBr disk): 3271, 2986, 1747, 1651, 1556 cm-1; H (500 MHz, CDCl3): 1.23 (3H, *t*, J = 7.0 Hz, OCH2CH3), 1.79 (2H, *m*, H-6), 1.91 (3H, *s*, CH3CO), 1.97 (3H, *s*, CH3CON), 2.03 (3H, *s*, CH3CO), 2.16 (3H, *s*, CH3CO), 2.77 (1H, *m*, H-1), 4.12 (2H, *q*, J = 7.0 Hz, OCH2CH3), 4.50 (1H, *m*, H-2), 5.05 (2H, *m*, H-4 and 5), 5.50 (1H, br, H-3), 5.56 (1H, *d*, J = 8.0 Hz, NH); C (125 MHz, CDCl3): 14.3 (OCH2CH3), 20.8 (CH3CO), 21.2 (CH3CO), 21.2 (CH3CO), 23.3 (CH3CON), 30.0 (C-6), 42.7 (C-1), 49.6 (C-2), 61.7 (OCH2CH3), 68.5 (C-5), 71.5 (C-3), 71.8 (C-4), 169.3, 169.9, 170.0, 170.7, 171.4 (carbonyls); *m/z* (ES+): 410 (MNa+).

**Ethyl *anti*-*anti*-*anti*-5-acetoxy-6-*tert*-butoxycarbonylamino-3-chloro-4-hydroxy-1-cyclohexene-1-carboxylate 28**:

To solution of epoxide **12** (240 mg, 0.75mmol) in dichloromethane was added acetic acid (120 ml, 2.10 mmol) and ZnCl2 (102mg, 0.75mmol). The mixture was stirred at room temperature until all the starting material was consumed (TLC ca. 12 h). The solvent was remove under reduced pressure and the residue was subjected to column chromatography eluting with petroleum ether/ethyl acetate (7:3) to give **28** as a white solid (200 mg, 83%); m.p 158-160oC; max (KBr disk): 3447 (br), 2979, 1765, 1703, 1652, 1536 cm-1; H (500 MHz, CDCl3): 1.30 (3H, *t*, J = 7.0 Hz, OCH2CH3), 1.42 (9H, *s*, OC(CH3)3), 2.10 (3H, *s*, CH3CO), 2.86 (1H, br, OH), 4.12 (1H, *m*, H-4), 4.24 (2H, *q*, J = 7.0 Hz, OCH2CH3), 4.61 (2H, *m*, H-3 and 6), 4.80 (1H, br, NH), 5.16 (1H, br, H-5), 6.81 (1H, *s*, H-2); C (125 MHz, CDCl3): 14.3 (OCH2CH3), 21.1 (CH3CO), 28.5 (OC(CH3)3), 50.3 (C-3), 57.3 (C-6), 61.7 (OCH2CH3), 72.8 (C-4), 73.7 (C-5), 80.9 (OC(CH3)3), 131.7 (C-1), 136.5 (C-2), 155.2 (NCO2), 165.0 (CO2), 170.9 (CH3CO); MS *m/z* (ES+): 400 (MNa+).

**Ethyl 2-hydroxy-5-oxo-4,9-dioxa-6-azatricyclo[3,3,1,11,8]decane-10-carboxylate 29**

A solution of epoxide **11** (200 mg, 1.01 mmol) in AcOH/H2O (9:1, 10 ml) was stirred at room temperature for 30 minutes. The reaction was quenched with sat. NaHCO3 (10 ml). The resulting solution was extracted with ethyl acetate (10 ml x 3). The combined organic layers were dried (MgSO4) and concentrated under reduced pressure to afford the crude product. Purification of the crude product by flash chromatography eluting with ethyl acetate/hexane (7:3) gave **29** (120 mg, 75%) as a white solid, mp 37-39oC; Found: C, 49.22; H, 5.15; N, 5.84%; Calc. for C10H13NO6 C, 49.38; H, 5.39; N, 5.76%; max (KBr disk): 3448 (br), 2979, 1733, 1681, 1463 cm-1; H (400 MHz, CDCl3): 1.29 (3H, t, J = 7.2 Hz, OCH2CH3), 2.59 (1H, d, J = 2.4 Hz, H-10), 3.83 (1H, d, J = 1.2 Hz, H-2), 4.21 (2H, q, J = 7.2 Hz, OCH2CH3), 4.32 (1H, m, H-7), 4.54 (1H, t, J = 1.2 and 1.5 Hz, H-8), 4.61 (2H, m, H-1 and 3), 5.98 (1H, br, NH); C (100 MHz, CDCl3): 14.1 (OCH2CH3), 53.1 (C-7), 54.3 (C-10), 61.9 (OCH2CH3), 67.2 (C-8), 75.6 (C-2), 79.1 (C-2), 85.1 and 85.5 (C-1 and 3), 150.1 (C-5), 170.1 (CO2C2H5); MS (EI): *m/z* 243 (M+), 98 (100%).

**X-ray crystallography**

X-ray diffraction experiments were carried out on a Bruker 3-circle diffractometers with CCD area detectors SMART 1K (for **26** and **28**) or APEX (for **2b**), using graphite-monochromated Mo-*K* radiation (=0.71073 Å) from sealed tube (**26** and **28**) or 60W Mo-target microfocus Bede Microsource® X-ray generator with glass polycapillary X-ray optics (**2b**). Low temperature of the crystals was maintained with Cryostream (Oxford Cryosystems) open-flow N2 gas cryostats. The structures were solved by direct methods and refined by full-matrix least squares (non-hydrogen atoms in anisotropic, all H atoms in isotropic approximation) against *F*2 of all reflections, using SHELXL 6.12 programs (Bruker AXS, Madison, Wisconsin, USA, 2001). Crystal data and experimental details are listed in Table 1. In **26** the O(5) atom is disordered between two positions with occupancies 85% and 15% [O(5’)].

Fig.1. Molecular structure of **2b** (50% thermal ellipsoids)

Fig. 2. Molecular structure of **26**

Fig. 3. Molecular structure of **28**

**Table 1.** Crystal Data

| Compound | **2b** | **26** | **28** |
| --- | --- | --- | --- |
| CCDC number | 604000 | 604001 | 604002 |
| Formula | C14H21NO5 | C17H25NO9 | C16H24ClNO7 |
| FW | 283.32 | 387.38 | 377.81 |
| Temperature, K | 120 | 120 | 120 |
| Crystal system | monoclinic | orthorhombic | monoclinic |
| Space group | P21/*c* (#14) | P*bca* (#61) | P21/*c* (#14) |
| *a*, Å | 8.5458(6) | 19.335(3) | 9.902(1) |
| *b*, Å | 11.243(1) | 9.4556(16) | 8.788(1) |
| *c*, Å | 15.371(1) | 21.594(4) | 22.520(3) |
| β, ˚ | 96.10(1) | 90 | 96.14(1) |
| *U*, Å3 | 1468.5(2) | 1749.6(3) | 1948.4(4) |
| *Z* | 4 | 8 | 4 |
| *D*calc (g/cm3) | 1.281 | 1.304 | 1.288 |
| μ, mm-1 | 0.10 | 0.11 | 0.23 |
| Reflections measured | 14745 | 41426 | 17291 |
| Unique reflections | 3366, 2994* | 4563, 3273* | 5173, 3731* |
| *R*int | 0.025 | 0.064 | 0.041 |
| *R*1 | 0.040* | 0.046* | 0.037* |
| w*R*2 | 0.107 | 0.114 | 0.090 |

*R*1=||*F*c|−|*F*o||/|*F*o|, *wR*2=[*w*(*F*o2− *F*c2)2/*w*(*F*o2)2]1/2

* For reflections with *F*22(*F*2)
